# Supplementary material for: Genome-Wide Identification and Evolutionary Analysis of Receptor-like Kinase Family Genes Provides Insights into Anthracnose Resistance of Dioscorea alata
Source: MDPI journal article supplement (doi:10.3390/plants13091274), 2024-05-05
Supplement: s1 [file s1]

Tree scale: 1

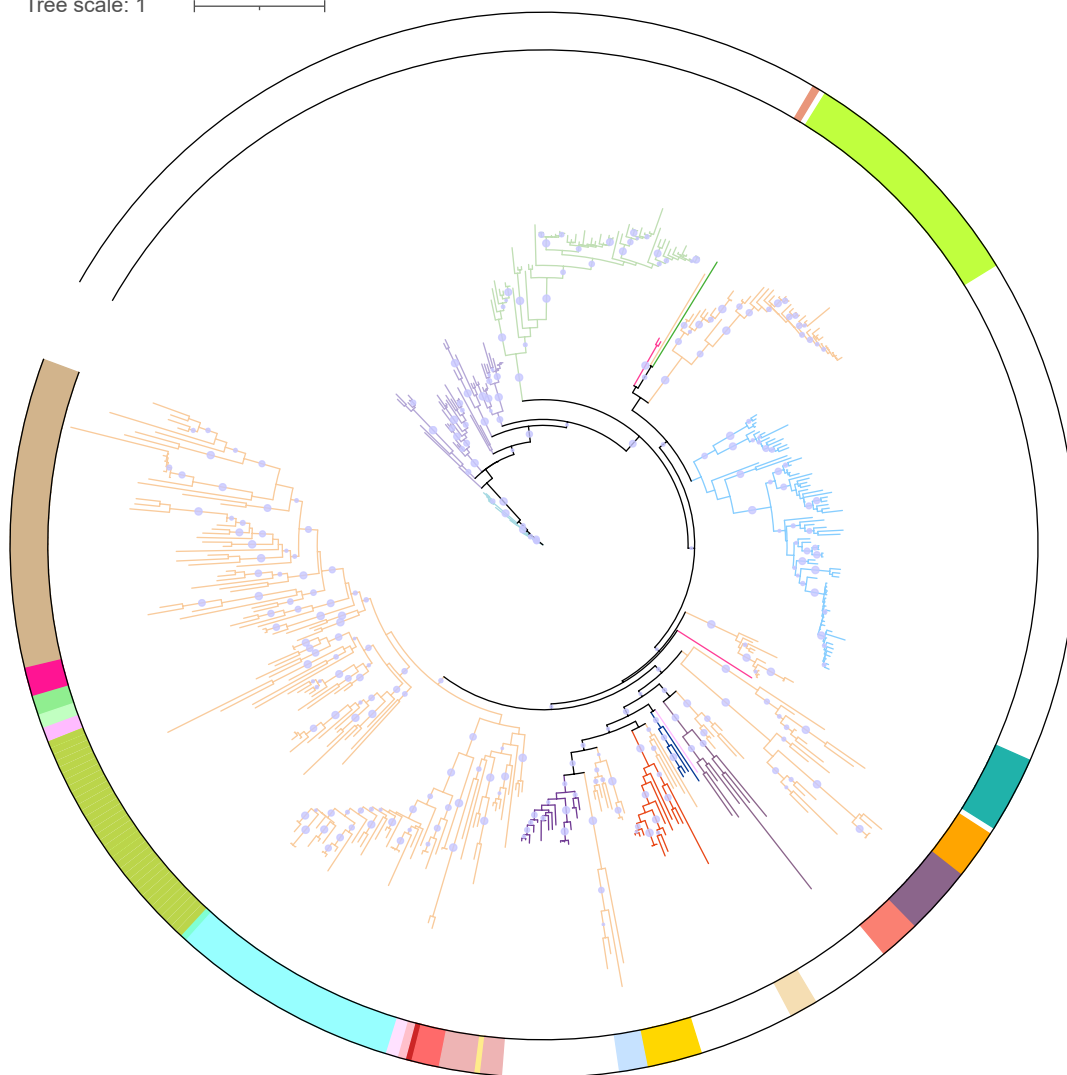

#### Branch Color

- C-LEC
- CR4L
- CrRLK1L-1
- DLSV
- L-LEC
- LRK10L-2
- LRR
- LysM
- RKF3
- SD-2b
- URK-1
- WAK
- WAK\_LRK10L-1

#### Tol Color

- |           |            |
|-----------|------------|
| LRR-I-1   | LRR-VIII-1 |
| LRR-II    | LRR-Xa     |
| LRR-III   | LRR-Xb-1   |
| LRR-IV    | LRR-Xb-2   |
| LRR-IX    | LRR-XI-1   |
| LRR-V     | LRR-XI-2   |
| LRR-VI-1  | LRR-XII    |
| LRR-VI-2  | LRR-XIIIa  |
| LRR-VII-1 | LRR-XIIIb  |
| LRR-VII-2 | LRR-XIV    |
| LRR-VII-3 | LRR-XV     |
