# Supplementary figures and images for: Genome-Wide Identification and Evolutionary Analysis of Receptor-like Kinase Family Genes Provides Insights into Anthracnose Resistance of Dioscorea alata
Source: MDPI journal article supplement (doi:10.3390/plants13091274), 2024-05-05

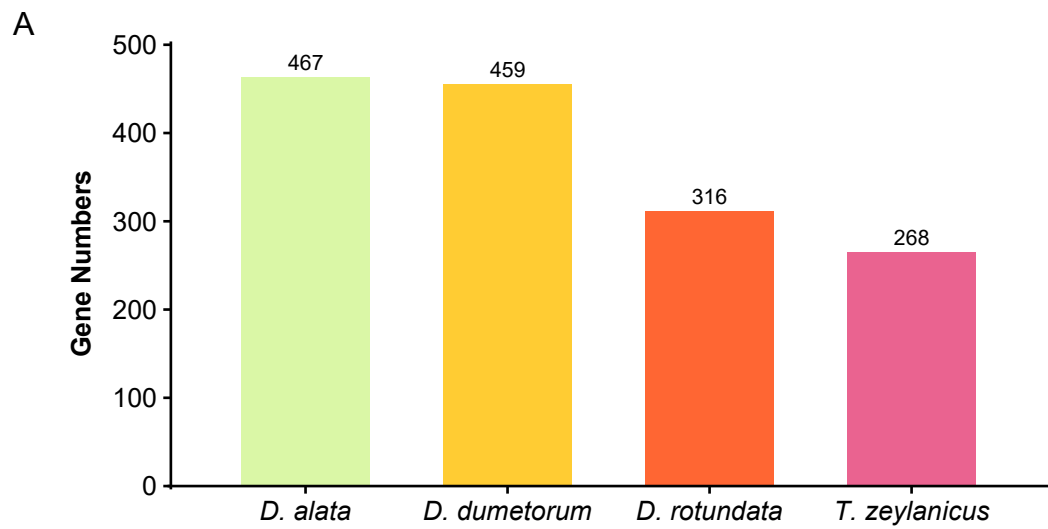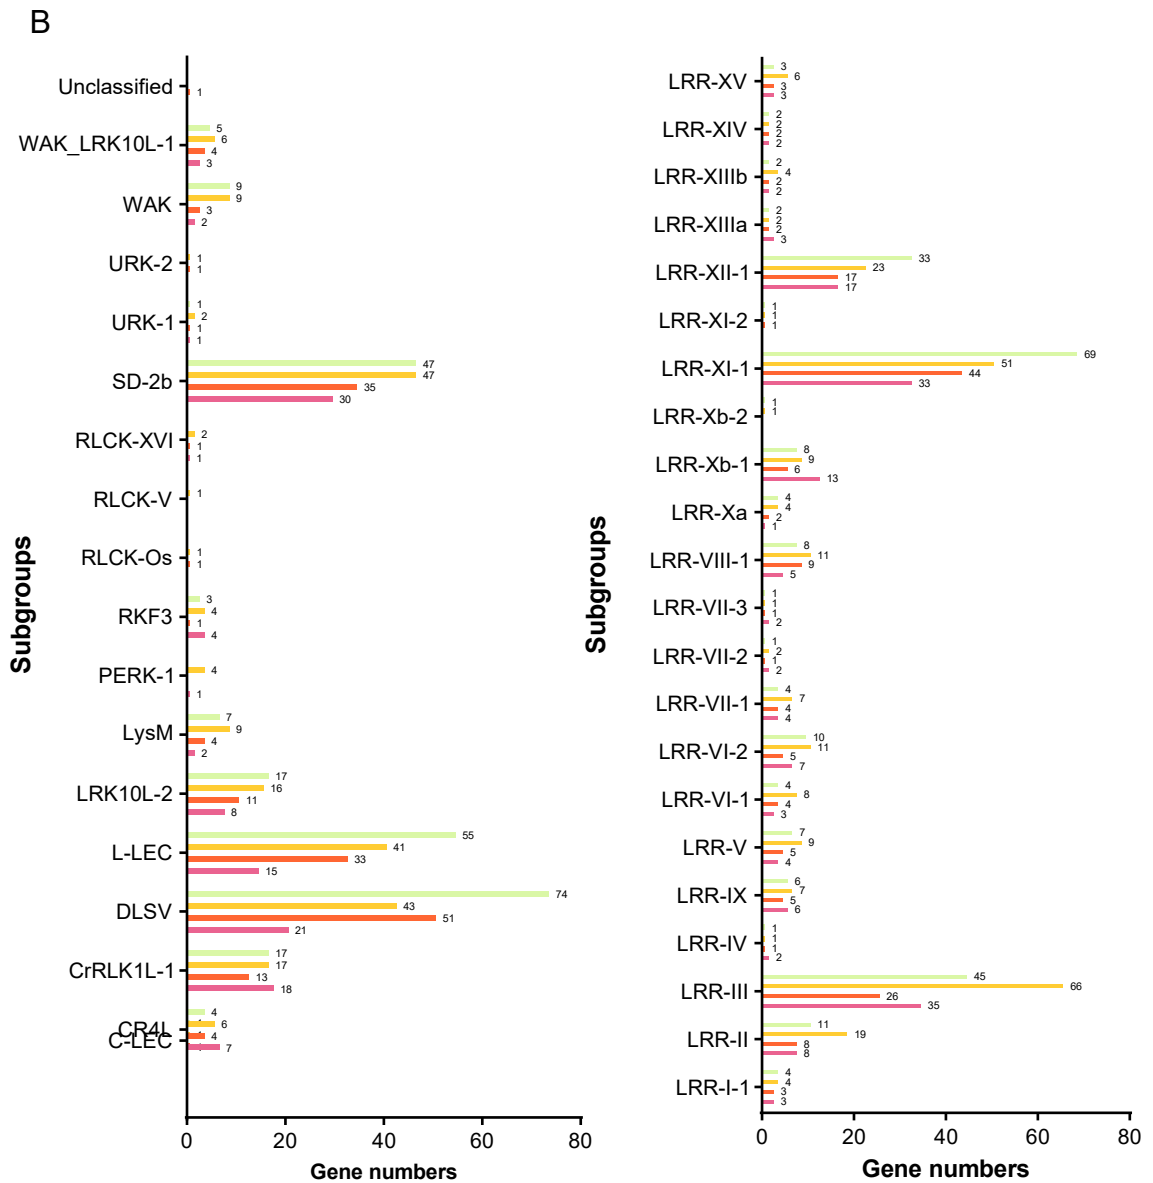

Supplement: s1 [file s1]

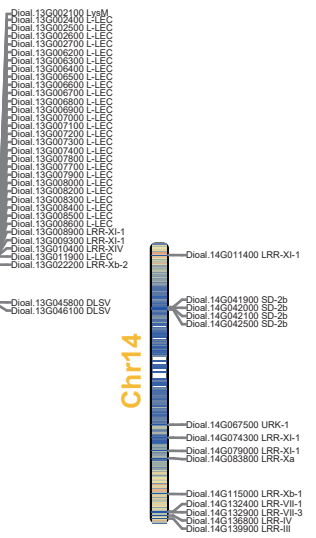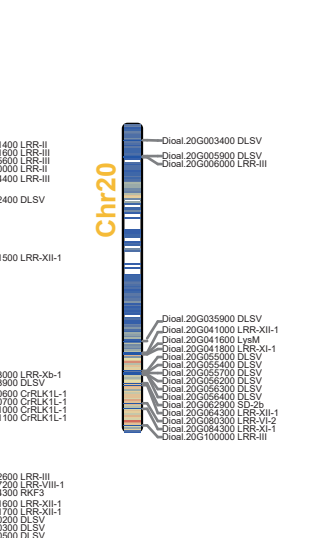

Supplement: s1 [file s1]
